# Supplementary material for: Tobacco, but Not Nicotine and Flavor-Less Electronic Cigarettes, Induces ACE2 and Immune Dysregulation
Source: Int J Mol Sci. 2020 Jul 31;21(15):5513. doi: 10.3390/ijms21155513 (PMC7432384; doi:10.3390/ijms21155513)
Supplement: Supplementary file 1 [file ijms-21-05513-s001.xlsx]

## Sheet: Sheet1
Table S1: Patient Characteristics for Each Study
	TCGA		Corbett et. al.
	Former Smokers	Current Smokers	Non e-cig users	E-cig Users
Gender
Male	24	10	11	11
Female	13	1	10	4
Race
White	33	8	14	11
African American	1	1	5	3
Age (Median)	69	S	43	35.7
